## RESEARCH ARTICLE

# Biochemical profile and *in vitro* biological activities of extracts from seven folk medicinal plants growing wild in southern Tunisia

Hajer Tlili<sup>1</sup>\*, Najjaa Hanen<sup>1</sup>\*, Abdelkerim Ben Arfa<sup>1</sup>, Mohamed Neffati<sup>1</sup>, Abdelbasset Boubakri<sup>1</sup>, Daniela Buonocore<sup>2</sup>, Maurizia Dossena<sup>2</sup>, Manuela Verri<sup>2</sup>, Enrico Doria<sup>1,2\*</sup>

**1** Laboratory of Pastoral Ecosystems and Valorisation of Spontaneous Plants and Microorganisms, Institute of Arid Regions (IRA), Medenine, Tunisia, **2** Department of Biology and Biotechnology, University of Pavia, Pavia, Italy

\* These authors contributed equally to this work.

\* [enrico.doria@unipv.it](mailto:enrico.doria@unipv.it)

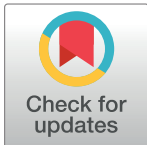

## OPEN ACCESS

**Citation:** Tlili H, Hanen N, Ben Arfa A, Neffati M, Boubakri A, Buonocore D, et al. (2019) Biochemical profile and *in vitro* biological activities of extracts from seven folk medicinal plants growing wild in southern Tunisia. PLoS ONE 14(9): e0213049. <https://doi.org/10.1371/journal.pone.0213049>

**Editor:** Gianfranco Pintus, Qatar University College of Health Sciences, QATAR

**Received:** February 13, 2019

**Accepted:** August 28, 2019

**Published:** September 17, 2019

**Copyright:** © 2019 Tlili et al. This is an open access article distributed under the terms of the [Creative Commons Attribution License](https://creativecommons.org/licenses/by/4.0/), which permits unrestricted use, distribution, and reproduction in any medium, provided the original author and source are credited.

**Data Availability Statement:** All relevant data are within the paper and its Supporting Information files.

**Funding:** The authors received no specific funding for this work.

**Competing interests:** The authors have declared that no competing interests exist.

## Abstract

Recently, much attention has been paid to the extracts obtained from plant species in order to analyse their biological activities. Due to the climate diversity in Tunisia, the traditional pharmacopoeia consists of a wide arsenal of medicinal plant species since long used in folk medicine, in foods as spices, and in aromatherapy. Although many of these species are nearly facing extinction, only a small proportion of them have been scientifically studied. Therefore, this study explores the biochemical properties of seven spontaneous plants, which were harvested in the arid Tunisian desert: *Marrubium vulgare* (L.), *Rhus tripartita* (Ucria) D.C., *Thymelaea hirsute* (L.) Endl., *Plantago ovata* (Forsk.), *Herniaria fontanesii* (J. Gay.), *Ziziphus lotus* (L.) and *Hyoscyamus albus* (L.). Extracts from these plants were found to contain different types of secondary metabolites (polyphenols, flavonoids, condensed tannins, crude saponins, carotenoids and alkaloids) that are involved in important biological activities. The biological activity of the extracts obtained from each Tunisian plant was assessed: first of all, leukaemia and colon cancer cell lines (K-562 and CaCo-2 respectively) were treated with different concentrations of extracts, and then the anti-proliferative activity was observed. The results showed, in particular, how the plant extract from *Rhus tripartita* significantly inhibits cell proliferation, especially on the K-562 tumour cell line. Subsequently, the anti-inflammatory activity was also assessed, and the results showed that *Herniaria fontanesii* and *Marrubium vulgare* possess the highest activity in the group of analysed plants. Finally, the greatest acetylcholinesterase inhibitory effect was exhibited by the extract obtained from *Rhus tripartita*.

In conclusion, all the Tunisian plants we analysed were shown to contain a remarkable amount of different bio-active compounds, thus confirming their involvement in several biological activities. *Rhus tripartita* and *Ziziphus lotus* were shown to be particularly effective in anti-proliferative activity, while *Herniaria fontanesii* were shown to have the best anti-inflammatory activity.

## Introduction

Nature has been a source of medicinal agents for thousands of years and an impressive number of modern drugs have been isolated from natural sources, many of them based on their use in traditional medicine. Today it is estimated that more than two thirds of the world's population relies on plant-derived drugs; some 7,000 medicinal compounds used in the Western pharmacopoeia are derived from plants [1].

Recently, much attention has been paid to extracts and biologically active compounds isolated from plant species in order to analyse their pharmacological activities [2,3].

These plants have been used extensively in folk medicine to treat ailments and diseases [4] and are still used in the rural areas of developing countries [4,5]. In fact, the World Health Organisation (WHO) reported that around 80% of the world's population still relies on plants as a source for primary health care [6] while traditional medicine is the only health source available for 60% of the global population [4]. Plants are the main ingredients of medicines in most traditional systems of healing and have been the source of inspiration for several major pharmaceutical drugs [7,8]. Medicinal plants are frequently the only form of cancer treatment for many people in North Africa, either due to low income or spatial distance from the urban treatment centres [9]. Tunisia has a high diversity of plants with several aromatic plant species traditionally used in folk medicines, in foods as spices, in massage and in aromatherapy.

Among the 2250 species that compose Tunisia's vascular flora [10,11], 1630 species are native to the arid and desert part of the country, which is characterised by low rainfall, high temperature and drying winds [12]. Remarkably, a wide range of plant species thrive under these conditions, which is of high economic and ecological significance. Due to the climate diversity in Tunisia, the traditional pharmacopoeia consists of a wide arsenal of medicinal plants [11]. Although many of these species are nearly facing extinction, only a small proportion of them has been scientifically studied [8]. Therefore, this study explores and compares some biochemical and biological properties of these spontaneous plants, harvested in Tunisian arid lands.

*Herniaria fontanesii* J. Gay Subsp. *fontanesii* is native to Europe, South America (Andes), central and west Asia and Africa. The plant grows in dry, particularly sandy and sunny environments. It has been reported that certain plants from the *Herniaria* genus have health beneficial properties. Both *Herniaria fontanesii* and *Herniaria glabra* (L.) have been used in traditional Moroccan medicine to treat kidney stones. It has also been found that these plant species contain relevant amount of saponins [13,14,15,16]. This can explain the medicinal use of these plants, since saponins are compounds known for their versatile biological effects.

*Hyoscyamus albus* (L.) is a plant belonging to Solanaceae family and commonly used in folk medicine in Tunisian and Libyan countryside. This plant is used for the treatment of inflammation, rheumatism, cough, fevers, motion sickness, bronchitis and spasms and it has antibacterial, antispasmodic, sedative and analgesic properties. Hyoscyamine, hyoscyne, skimmianine, apo-hyoscyne, apoatropine are extracted from aerial parts of *Hyoscyamus* species and are the most responsible of the biological activity [7,17,18].

*Marrubium vulgare* (L.), from family *Lamiaceae*, is a popular herb traditionally used in many countries as an antidiabetic and antihypertensive agent. *M. vulgare* is known for its remarkable antioxidant activity due to the presence of flavonoids, tannins, terpenes, and phenols. Marrubiin and marrubenol are two important diterpenes from *M. vulgare*, which have shown a variety of activities. Marrubiin is reported to own analgesic, antidiabetic, antiplatelet, anticoagulant, antispasmodic, gastroprotective, anti-hypertensive and antiedematogenic properties [19,20,21,22].

*Plantago ovata* Forsk. (Psyllium), a plant of the *Plantaginaceae* family, has long been used as folk medicine. It is a dicot annual herb which is indigenous to Asia, the Mediterranean

region of Europe and North Africa. *P. ovata* has gained importance throughout the world because of its wide variety of medicinal and economic importance, which makes it useful in the pharmaceutical, agricultural, cosmetic and food industries. *P. ovata* serves as a reservoir for bioactive compounds such as polyphenols (in particular flavonoids), which possess a wide range of medicinal properties. Because of its high fiber content (Psyllium husk contains a high proportion of hemicellulose, composed of a xylan backbone linked with arabinose, rhamnose, and galacturonic acid units (arabinoxylans), psyllium seed degrades more slowly than pectin and produces fairly large amounts of butyrate and acetate. Butyric acid exhibits antineoplastic activity against colorectal cancer, and it represents the preferred oxidative substrate for colonocytes, and may be helpful in the treatment of ulcerative colitis [23,24,25,26].

*Rhus tripartita* (Ucria) D.C. is a local pre-Saharan Tunisian plant that grows largely under rainfall ranging between 100 and 600 mm/year and at altitudes ranging from 10 to 500 m. Phytochemicals, especially phenolic compounds as secondary metabolites, are of great importance due to their beneficial effects as anti-carcinogenic, anti-thrombotic and anti-inflammatory. The root bark extract has been reported to be beneficial in curing gastric ulcer. Currently, food scientists and nutrition specialists suggest that these phytochemicals found in the plant offer many health benefits when consumed as part of the usual diet. Concerning the chemical studies of this plant, several compounds such as flavonoids, biflavonoids, isobiflavonoids, catechin, epicatechin-3-O-gallate, proanthocyanidin oligomers and polymers, polysaccharides, condensed tannins have been isolated from this plant and found to be responsible of several biological activities such as anti-inflammatory, antiulcerogenic, antimalarial, antimicrobial, antitumor [27,28,29,30].

*Thymelaea hirsuta* (L.) Endl., commonly known as “Methnane” in Tunisia, is an evergreen shrub belonging to the flowering plant family *Thymelaeaceae*, which is native to the Mediterranean region, north of central Europe and east of central Asia. The plant is traditionally used in Tunisia as an anti-septic, anti-inflammatory, antidiabetic and for the treatment of hypertension. The traditional medicinal use of this plant is not based on scientific research and few data dealing with its phytochemical composition are available. The anti-melanogenesis effect of *T. hirsuta* extracts on B16 murine melanoma cells was reported. Finally, antitumor efficacy, due to the presence of a wide range of flavonoids, was also observed [31,32,33,34].

*Zizyphus lotus* (L.) Desf., also known as Jujube, is a deciduous shrub which belongs to Rhamnaceae family. Generally, it grows in arid or semi-arid countries, particularly in the Mediterranean region and southern European countries. Several parts of *Zizyphus* have been used in traditional and ancestral medicine, both in North Africa and Middle East, for the treatment of several pathologies including liver complaints, obesity, urinary troubles, diabetes, skin infections, fever, diarrhea, insomnia, inflammation and peptic ulcers. Several biologically active molecules, in particular alkaloids and saponins, have been isolated from this plant. Hence, the presence of these molecules and polyphenols in the *Zizyphus* extracts was supposed to be responsible for most of its beneficial effects [35,36,37,38].

## Materials and methods

### Chemicals

All reagents and standards were purchased by Sigma-Aldrich Chemicals Co. (St. Louis, MO) and Merck (Darmstadt, Germany). Cell culture media and all other supplements were purchased by ATCC<sup>®</sup> (American Type Culture Collection) Manassas, VA 20108 USA.

### Plant material

All the plant material was provided by the Institut des Regions Arides (IRA) in Medenine, Tunisia, where the plant species, belonging to different plant families from South East of

**Table 1. Geographical coordinates of the collection sites, collection date and voucher specimen's number of studied plants.**

| Plant                       | Collection site       | Collection date | Geographical coordinates |                   | Accession numbers |
|-----------------------------|-----------------------|-----------------|--------------------------|-------------------|-------------------|
|                             |                       |                 | Longitude                | Latitude          |                   |
| <i>Marrubium vulgare</i>    | Zmertem               | 27/02/2017      | 10° 12' 83.163" E        | 33° 41' 78.117" N | IRABS1832         |
| <i>Rhus tripartita</i>      | EL Fje/ Boughrara     | 28/02/2017      | 10° 40' 20.39" E         | 33° 32' 9.59" N   | IRABS1830         |
| <i>Herniaria fontanesii</i> | Tounine               | 10/02/2017      | 10° 14' 51.177" E        | 33° 51' 07.122" N | IRABS1827         |
| <i>Ziziphus lotus</i>       | Smaeillette/ Medenine | 20/08/2016      | 10° 30' 19.73" E         | 33° 21' 17.82" N  | IRABS1826         |
| <i>Plantago ovata</i>       | Beni khedache         | 24/04/2016      | 10° 11' 57.84" E         | 33° 15' 5.04" N   | IRABS1829         |
| <i>Thymelaea hirsuta</i>    | Toujane               | 08/02/2017      | 10° 07' 60.00" E         | 33° 27' 59.99" N  | IRABS1828         |
| <i>Hyoscyamus albus</i>     | Matmata               | 18/01/2017      | 9° 58' 0.29" E           | 33° 32' 20.09" N  | IRABS1831         |

<https://doi.org/10.1371/journal.pone.0213049.t001>

Tunisia (arid land) were collected (200–250 g per species) during the vegetative phase. The harvested plants, *Marrubium vulgare* L., *Herniaria fontanesii* Gay., *Plantago ovata* Forsk., *Rhus tripartita* (Ucria), *Thymelaea hirsuta* (L.), *Ziziphus lotus* (L.) and *Hyoscyamus albus* (L.) were authenticated by botanist Dr. Mohammed Neffati according to the “Flora of Tunisia” catalogue [39]. Voucher specimens were deposited at the herbarium of the IRA. The harvested plant samples were processed (powdered at around 100 mesh, using a Retsch S/S Cross Beater Hammer Mill Sk1) then dried in the shade at room temperature for two weeks) and finally stored in dark condition until use. Geographical coordinates of the collected plants and the voucher specimen's number are listed in In [Table 1](#).

The images of the plants studied in this work are shown in [Fig 1](#).

### Preparation of the plant extracts

The aerial part of each plant was finely powdered and used for the different biochemical assays. Two different solvents (methanol 70% and acetone 70%) were used in order to obtain two plant extracts solutions (1 g / 10 ml), which were macerated for 24h in shaking conditions (50 rpm) and used to assay the total content of polyphenols, the total content of flavonoids and the total antioxidant activity (DPPH test and FRAP test). For other assays (biological assays, flavonoids, condensed tannins, carotenoids, saponins and alkaloids analysis), the extraction method is described in each section.

### Total polyphenol content

The total content of phenolics was measured according to the method described by Medoua [40]. For each sample, methanol and acetone extracts (pH 2.5 using HCl) were centrifuged at 6000 rpm for 10 minutes; the supernatants were collected and the residue pellets were further washed with 1.5 ml of acetone 70% employing mechanical agitation (800 rpm, 30 minutes at 4° C) and then centrifuged. The resulting supernatants were assayed using the Folin-Ciocolteau reagent. Absorbance was measured at 725 nm and results were expressed in Gallic Acid Equivalents using a gallic acid standard curve.

### Total flavonoid content

Total flavonoid content of plant extracts was spectrophotometrically determined by the aluminium chloride method [41]. Briefly, 150 µl of alcoholic extract, prepared as above, was mixed with 600 µl H<sub>2</sub>O and 45 µl 5% NaNO<sub>2</sub>. The solution was incubated for 5 minutes at room temperature and then 45 µl 10% AlCl<sub>3</sub> was added and incubated for one more minute. Finally, 300 µl 1M NaOH and 300 µl H<sub>2</sub>O were added. Absorbance at 510 nm was measured from methanol and acetone extracts. Total flavonoid concentration was determined by a

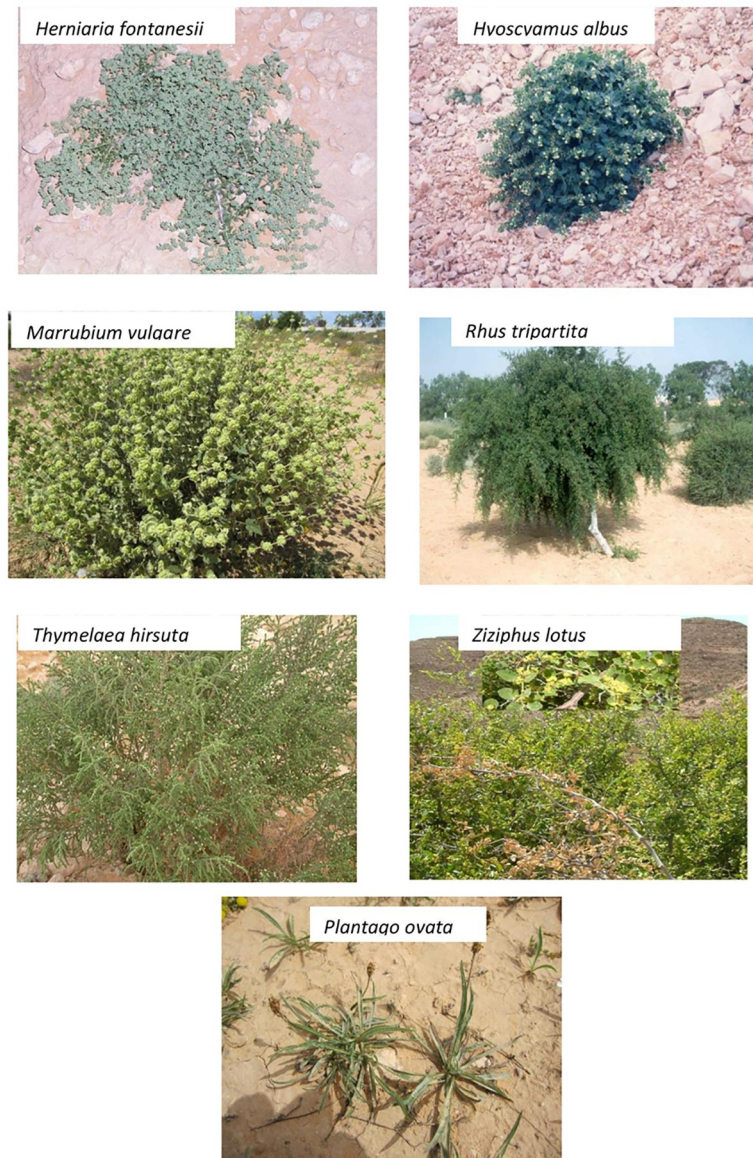

**Fig 1. Photos of the plants.** Photos of studied plants collected from Tunisian arid regions.

<https://doi.org/10.1371/journal.pone.0213049.g001>

catechin standard curve. Results were expressed as Catechin Equivalents (CE mg 100 g-1 FW) [30]. The samples obtained using this procedure were also assayed by HPLC for quercetin and kaempferol determination.

### Condensed tannin content

Firstly, 0.5 g of each plant powder was mixed with 10 ml of acetone / methanol (containing 1% HCl) solution (7:3) and shaken (800 rpm) at 60 °C for 1 hour in the dark. The samples (in triplicate) were then sonicated and centrifuged at 6000 rpm for 10 minutes and the supernatant was filtered in new test tubes. An aliquot (0.5 ml) of each extract was mixed with 3 ml of butanol: HCl (95:5, v/v) solution in screw-capped test tubes and incubated for 60 minutes at 95 °C. A red coloration developed and the absorbance was then read at 550 nm. All results were

expressed as mg of standard delphinidin equivalents/g dry material. A linear response was obtained between 1 µg and 5 µg of delphinidin / ml solution.

### Carotenoid content

Sample preparation was performed according to the method used by Kurilich [42] with modifications. Firstly, 0.1 g of dry plant material was added to 25 ml of a chloroform: ethanol: diethyl ether solution (2:1:0.5) containing BHT. Potassium hydroxide (1 ml, 80% w/v) was added to the mixture for saponification and the samples were stirred for 1 hour. The solution was then transferred to a separator funnel where 30 ml of a chloroform: ethanol (2:1) solution was added. After layer separation, combined organic layers were washed with 50 ml of 5% NaCl and completely dried by rotavapor. The residue was then resuspended with hexane and spectrophotometrically assayed (Perkin Elmer UV-VIS spectrophotometer) at 450 nm, using β-carotene as standard. The same samples were then used for HPLC analysis of lutein.

### Saponin content

Total saponin content (percent yield) was determined by gravimetric method as described by Kaur [43]. The methanolic extracts from each plant (1 g in 10 ml) were macerated for 24 hours and then partitioned in a water and n-butanol (1:1 ratio) solution. This solution was poured into the separator funnel and kept for 2 hours. The upper n-butanol layer was separated and the solvent was evaporated to obtain crude saponin extract.

### Alkaloid content

Total content of alkaloids was determined according to the method described by Biradar [44] with modifications. Firstly, 5 g of each sample was added to 50 ml of a solution containing 10% acetic acid in ethanol and mildly stirred for 48 hours. After filtration, the extracts were concentrated to one-quarter of the original volume and 2 ml of 3% H<sub>2</sub>SO<sub>4</sub> and around 8 ml of water were added to reach pH 2.5. This solution was transferred to a separator funnel where 10 ml of petroleum ether: diethyl ether (1:1) solution was added. The bottom phase was collected and added to concentrate ammonium hydroxide solution until precipitation was complete (pH 8.0). The whole solution was allowed to settle and the precipitated phase was collected and washed again with ammonium hydroxide and chloroform. This phase, dried first with Na<sub>2</sub>SO<sub>4</sub>, was then completely dried by rotavapor and weighed to estimate the percentage of alkaloids.

### DPPH test

By means of the widely used 2,2-Diphenyl-1-Picrylhydrazyl (DPPH) test, it is possible to measure the anti-radical power of the prepared extracts. Different volumes of the samples (from 25 to 75 µl) were added to 1 ml of 0.2 mM DPPH solution and to a pure methanol solution for a total volume of 1.5 ml. After incubation of the samples in the dark for 60 minutes, the absorbance at 517 nm was read against a methanol control and the results were presented as EC<sub>50</sub> (effective concentration, mg/ml) obtained by plotting the concentration of the tested sample with the percentage of radical scavenging activity [45]. The Ascorbic acid was used as a reference standard (positive control). The solvents used for the extraction were used as negative controls.

### FRAP test

The reducing power of the extracts was determined according to the method reported by Benzie [46]. Firstly, 2.5 ml of each methanolic and/or acetone extract was added to a reaction solution with 2.5 ml of phosphate buffer (0.2 M, pH 6.6) and 2.5 ml of 1% potassium ferricyanide  $K_3Fe(CN)_6$  (freshly prepared). After incubation at 50°C for 20 minutes, the mixture was centrifuged at 6000 rpm for 10 minutes and then 2.5 ml of trichloroacetic acid (10%) was added. An aliquot of 2.5 ml of the supernatant was mixed with 2.5 ml distilled water and 0.5 ml of  $FeCl_3$  (0.1%). The absorbance was measured at 700 nm. The  $EC_{50}$  value (mg/ml) was calculated as the effective concentration at which the reducing capacity is 50% less. Ascorbic acid was used as a reference standard. The solvents used for the extraction were also used as negative controls.

### Anti-proliferative activity

The anti-proliferative activity was performed treating the cells with 70% ethanol extracts (EE), obtained after drying of the acetone extract, macerated for 24 hours, and it was assessed by evaluating the cell viability by MTT assay using 3-(4,5-dimethylthiazol-2-yl)-2,5-diphenyl-tetrazolium bromide reagent or MTT (CAS Number: 298-93-1, Sigma-Aldrich®) [47]. In brief, CaCo-2 cells and K-562 cells were maintained as a culture in Dulbecco's modified Eagle's medium in 96-well plates ( $2 \times 10^5$  cells / well) and incubated at 37°C with 5% of  $CO_2$  for 24 hours. The medium was then replaced with another medium containing the extracts from each plant in the final concentration of 100 µg/ml. After incubation for 48 hours, this medium was replaced once again with MTT (5 mg/ml PBS)-containing medium (0.45 mg/ml final concentration). The plates were then incubated at 37°C for 48 hours. Sodium dodecyl sulphate (SDS; 10% v/v) was then added to each well (100 µl), followed by overnight incubation at 37°C. This reagent was used to solubilise and detect the formazan-crystals and its low concentration was determined by optical density. Absorbance was obtained at 570 nm using a microplate reader (Powerscan HT; Dainippon Pharmaceuticals USA Corporation, NJ, USA). Data are presented as percentage of cell viability against a control (100% of cell viability) using 100 µg/ml as the only concentration for all plant extracts to test for cell viability. This concentration was chosen according to the inhibiting concentration ( $IC_{50}$ ) of each plant extract, previously determined (Table 2).

### In vitro anti-inflammatory activity

This method was based on inhibition of albumin denaturation [48]. The reaction mixture consists of the methanolic extract, which is more effective in the extraction of the whole complex

**Table 2.**  $IC_{50}$  values (µg/ml), as mean value ± standard deviation, obtained for different plant extracts tested on CaCo2 and K562 cell lines.

| Sample                | $IC_{50}$ (µg/ml) |                |
|-----------------------|-------------------|----------------|
|                       | CaCo 2            | K562           |
| <i>R. tripartitum</i> | 44.873 ± 2.746    | 42.898 ± 3.369 |
| <i>M. vulgaris</i>    | 96.193 ± 2.97     | 97.884 ± 2.648 |
| <i>P. ovata</i>       | >100              | >100           |
| <i>H. fontanesii</i>  | >100              | >100           |
| <i>T. hirsuta</i>     | 94.743 ± 2.805    | >100           |
| <i>H. albus</i>       | 37.88 ± 1.015     | >100           |
| <i>Z. lotus</i>       | 84.22 ± 3.261     | >100           |

<https://doi.org/10.1371/journal.pone.0213049.t002>

of metabolites, of each tested plant, at a concentration of 100 µg/ml (this concentration was chosen according to the inhibiting concentration (IC<sub>50</sub>) of each plant extract previously determined (S1 Fig and S2 Fig) and 1% aqueous solution of bovine albumin fraction. The pH of the reaction mixture was adjusted using a small amount of 1N HCl. The samples were incubated at 37°C for 20 minutes and then heated at 67°C for 20 minutes. After cooling the samples, the turbidity was measured spectrophotometrically at 660 nm. The experiment was performed in triplicate. Acetyl salicylic acid (ASA) in the final concentration of 100 µg/ml was used as a reference drug and treated similarly for determination of absorbance. Percentage inhibition of protein denaturation was calculated as follows:

$$\%Inhibition = \frac{Abs\ control - Abs\ sample}{Abs\ control} \times 100$$

### Acetylcholinesterase inhibition

Acetylcholinesterase (*AChE*) enzymatic activity was measured according to the method described by Khadri [49] with some modifications. One gram of each plant material was extracted with 10 ml of 70% ethanol. After 24 hours of maceration, the samples were filtrated, dried and the residue was suspended with different volumes of water (0.0015g / ml). An aliquot of 105 µl of Tris–HCl buffer (50 mM, pH 8), 35 µl of each sample in the different concentrations and 10 µl acetylcholinesterase solution (0.26 U/ml) were mixed in 96 well plates and incubated for 15 minutes. Afterwards, 25 µl of AchI (acetylcholine iodide, 0.023 mg/ml) and 142 µl of DTNB (3 mM) were added. The absorbance was read at 405 nm when the reaction reached the equilibrium (around 10 minutes). A control reaction was carried out using water instead of extract and was considered 100% activity. Inhibition, in percentage, was calculated in the following way:

$$I (\%) = 100 - (A\ sample/A\ control) \times 100$$

Tests were carried out in triplicate. Extract concentration providing 50% enzymatic inhibition (IC<sub>50</sub>) was obtained by plotting the inhibition percentage against extract concentrations.

### HPLC analysis

Chromatographic analysis of lutein was performed using a Shimadzu system equipped with DiscoVery BIO Wide Pore C18-5 column and a PDA detector (SPD-M20A). The used solvents were (A) methanol: 1M ammonium acetate 8:2 and (B) methanol:acetone 8:2. The injection volume was 20 µl and the flow rate 1ml/min. UV absorbance was settled at 450 nm. The gradient for elution was linear from 0 to 100% B in 20 minutes; after 5 minutes, 100% of A for a further 5 minutes. Finally, a linear flow of 100% A for 5 minutes was used to equilibrate the column.

### LC-ESI-MS analysis

Acetonic extracts (100 µg/ml) of plants were filtered through a 0.45 µm membrane filter before injection into the HPLC system. LC-ESI-MS analysis was performed using a LCMS-2020 quadrupole mass spectrometer (Shimadzu, Kyoto, Japan) equipped with an electrospray ionization source (ESI) and operated in negative ionization mode. The temperature of quadrupole was DL: 275°C, heat block: 450°C. Mass spectrometer was coupled online with an ultra-fast liquid chromatography system that consisted of a LC-20AD XR binary pump system, SIL-20AC XR autosampler, CTO-20AC column oven and DGU-20A 3R degasser (Shimadzu,



Kyoto, Japan). A DiscoVery BIO Wide Pore C18-5 (Thermo Electron, Dreieich, Germany) (15 cm x 4.6 mm, 5 μm) was applied for analysis. The mobile phase was composed of A (0.1% formic acid in H<sub>2</sub>O, v/v) and B (0.1% formic acid in methanol, v/v) with a linear gradient elution: 0–14 min, 10% B; 14–24, 20% B, 27–37, 55% B, 37–45, 100% B, 45–50, 10% B. Re-equilibration duration was 5 minutes between individual runs. The flow rate of the mobile phase was 0.4 ml/min, the column temperature was maintained at 40°C and the injection volume was 5 μl. Spectra were monitored in mode SIM (Selected Ion Monitoring) and processed using Shimadzu LabSolutions LC-MS software.

### Statistical analysis

A descriptive analysis was performed to describe the entire results within each kind of test. Concerning the anti-proliferative activity, an unimpaired student T-test was used to compare treated cells with control cells. Regarding the biochemical composition analysis, antioxidant activity, the in vitro anti-inflammatory activity and the acetyl cholinesterase inhibition, a one-way analysis of variance (ANOVA one-way) followed by DUNCAN test was performed to test possible significant differences among mean values from different species. The level of significance was set at P<0.05 for all analyses. Statistical analyses were performed using SPSS v.20 software.

## Results and discussion

### Analysis of secondary metabolites and antioxidant properties

Results about the total polyphenol content (including flavonoids and condensed tannins), the carotenoid content, the percentage of saponins and alkaloids in all the plant samples, and the antioxidant activity are presented in Tables 3 and 4, respectively.

Antioxidant activity measured by the DPPH test and the FRAP test, in both methanol and acetone extracts, showed remarkable variability. Considering the results obtained by using both extraction methods, the highest radical scavenging activity demonstrated by the DPPH test was found in the methanol extract of *Z. lotus*: it was around 10 times higher than the average value observed in the other plant samples extracted with the same solvent. The extraction carried out with acetone provided lower EC<sub>50</sub> results (hence higher antioxidant activity) than

Table 3. Phytochemical composition of plant extracts.

|                      | Total polyphenols (mg/g)   |                             | Total flavonoids (mg/g)   |                           | Condensed tannins (mg/ml) | Total carotenoids (mg/ml) | Lutein (mg/ml)            | Crude saponins (%)      | Alkaloids (%)           |
|----------------------|----------------------------|-----------------------------|---------------------------|---------------------------|---------------------------|---------------------------|---------------------------|-------------------------|-------------------------|
|                      | 70% methanol               | 70% acetone                 | 70% methanol              | 70% acetone               |                           |                           |                           |                         |                         |
| <i>H. fontanesii</i> | 27.23 ± 0.012 <sup>d</sup> | 41.13 ± 0.050 <sup>d</sup>  | 8.26 ± 0.22 <sup>e</sup>  | 13.05 ± 0.26 <sup>d</sup> | 1.31 ± 0.05 <sup>f</sup>  | 0.78 ± 0.09 <sup>e</sup>  | 0.03 ± 0.005 <sup>d</sup> | 0.3 ± 0.03 <sup>f</sup> | 0.3 ± 0.04 <sup>d</sup> |
| <i>H. albus</i>      | 22.15 ± 0.026 <sup>f</sup> | 21.16 ± 0.041 <sup>f</sup>  | 21.57 ± 0.44 <sup>b</sup> | 20.09 ± 0.40 <sup>b</sup> | 2.20 ± 0.12 <sup>e</sup>  | 2.03 ± 0.12 <sup>c</sup>  | 0.19 ± 0.010 <sup>b</sup> | 0.7 ± 0.08 <sup>d</sup> | 0.4 ± 0.04 <sup>c</sup> |
| <i>M. vulgare</i>    | 18.15 ± 0.006 <sup>g</sup> | 16.07 ± 0.008 <sup>g</sup>  | 14.46 ± 0.35 <sup>d</sup> | 12.49 ± 0.29 <sup>d</sup> | 4.38 ± 0.09 <sup>d</sup>  | 3.21 ± 0.18 <sup>a</sup>  | 0.43 ± 0.040 <sup>a</sup> | 0.4 ± 0.03 <sup>e</sup> | 0.3 ± 0.03 <sup>d</sup> |
| <i>P. ovata</i>      | 23.92 ± 0.021 <sup>e</sup> | 27.60 ± 0.039 <sup>e</sup>  | 17.63 ± 0.41 <sup>c</sup> | 16.39 ± 0.26 <sup>c</sup> | 5.13 ± 0.11 <sup>c</sup>  | 2.93 ± 0.15 <sup>b</sup>  | 0.18 ± 0.007 <sup>b</sup> | 0.8 ± 0.05 <sup>c</sup> | 0.1 ± 0.01 <sup>e</sup> |
| <i>R. tripartita</i> | 91.58 ± 0.049 <sup>a</sup> | 103.67 ± 0.071 <sup>a</sup> | 14.26 ± 0.61 <sup>d</sup> | 23.51 ± 0.25 <sup>b</sup> | 9.96 ± 0.22 <sup>a</sup>  | 0.85 ± 0.06 <sup>e</sup>  | 0.04 ± 0.005 <sup>d</sup> | 1.2 ± 0.07 <sup>a</sup> | 0.4 ± 0.03 <sup>c</sup> |
| <i>T. hirsuta</i>    | 47.25 ± 0.033 <sup>b</sup> | 50.09 ± 0.051 <sup>b</sup>  | 27.60 ± 0.72 <sup>a</sup> | 36.83 ± 0.31 <sup>a</sup> | 7.63 ± 0.17 <sup>b</sup>  | 1.25 ± 0.11 <sup>d</sup>  | 0.10 ± 0.006 <sup>c</sup> | 0.4 ± 0.05 <sup>e</sup> | 1.3 ± 0.06 <sup>a</sup> |
| <i>Z. lotus</i>      | 31.52 ± 0.045 <sup>c</sup> | 43.02 ± 0.044 <sup>c</sup>  | 12.32 ± 0.31 <sup>c</sup> | 17.50 ± 0.25 <sup>c</sup> | 2.99 ± 0.11 <sup>e</sup>  | 0.99 ± 0.07 <sup>e</sup>  | 0.03 ± 0.002 <sup>d</sup> | 0.9 ± 0.10 <sup>b</sup> | 0.5 ± 0.03 <sup>b</sup> |

Data are presented as mean values ± standard deviation (n = 3). Statistical analysis: ANOVA test and DUNCAN test. The different letters above the values in the same column indicate significant differences (p<0.05). Values with the same superscript letters in the same column are not significant.

<https://doi.org/10.1371/journal.pone.0213049.t003>

Table 4. Antioxidant activity of plant extracts.

|                      | DPPH ( $EC_{50}$ , mg/ml) |                           | FRAP ( $EC_{50}$ , mg/ml) |                           |
|----------------------|---------------------------|---------------------------|---------------------------|---------------------------|
|                      | 70% methanol              | 70% acetone               | 70% methanol              | 70% acetone               |
| <i>H. fontanesii</i> | 1.30 ± 0.023 <sup>b</sup> | 1.26 ± 0.025 <sup>b</sup> | 0.19 ± 0.006 <sup>c</sup> | 0.12 ± 0.004 <sup>d</sup> |
| <i>H. aureus</i>     | 0.15 ± 0.003 <sup>g</sup> | 0.22 ± 0.001 <sup>c</sup> | 0.32 ± 0.003 <sup>a</sup> | 0.46 ± 0.042 <sup>b</sup> |
| <i>M. vulgare</i>    | 1.11 ± 0.012 <sup>c</sup> | 1.66 ± 0.027 <sup>a</sup> | 0.08 ± 0.003 <sup>g</sup> | 0.06 ± 0.008 <sup>e</sup> |
| <i>P. ovata</i>      | 0.56 ± 0.010 <sup>d</sup> | 0.48 ± 0.004 <sup>c</sup> | 0.17 ± 0.012 <sup>d</sup> | 0.20 ± 0.006 <sup>c</sup> |
| <i>R. tripartita</i> | 0.44 ± 0.008 <sup>e</sup> | 0.30 ± 0.003 <sup>d</sup> | 0.22 ± 0.010 <sup>b</sup> | 0.75 ± 0.001 <sup>a</sup> |
| <i>T. hirsuta</i>    | 1.90 ± 0.015 <sup>a</sup> | 0.17 ± 0.001 <sup>f</sup> | 0.11 ± 0.005 <sup>f</sup> | 0.10 ± 0.010 <sup>d</sup> |
| <i>Z. lotus</i>      | 0.19 ± 0.036 <sup>f</sup> | 0.11 ± 0.002 <sup>g</sup> | 0.13 ± 0.005 <sup>e</sup> | 0.18 ± 0.006 <sup>c</sup> |

Data are presented as mean values ± Standard deviation (n = 3). Statistical analysis: ANOVA test and DUNCAN test (p < 0.05). Values with the same superscript letters in the same column are not significant.

<https://doi.org/10.1371/journal.pone.0213049.t004>

those registered for the methanol extract, except in *M. vulgare* and in *H. albus*. In particular, in *T. hirsuta*, the antiradical activity measured in the acetone extract was almost 11 times higher than that observed in the methanol extract.

The FRAP test revealed how the most significant difference in the ferric reducing antioxidant power was observed in *R. tripartita* where the methanol extract showed an antioxidant activity that was almost 3.5 times higher than the acetone extract. Regarding total polyphenol content, few significant differences were found between the two types of solvent extraction. In particular, the acetone extract of *H. fontanesii* showed a phenolic content that was around 50% higher than the methanol extract. *R. tripartita* presented the highest value of these secondary metabolites: almost 3.5 times higher than the average registered for the other plants, regardless of the solvent used for extraction. *T. hirsuta* showed the highest content of total flavonoids, both for methanol and acetone extract. There are not many data available in literature about the plants examined in this study, so making a comparison of the results we obtained is not easy. Nonetheless, a few papers reported the amount of phenolics in some of these plants; recently, in a review about the biochemical composition of different parts of *Z. lotus*, Abdoul-Azize [50] reported around 7 mg/g of phenolics to be present in the leaves, almost 5 times less than the amount measured in our study. Moreover, in the same review, the tannin content observed in the leaves was the same that we measured in the samples described in this paper (around 3.0 mg/g). Conversely, the content of phenolics in the leaves of *T. hirsuta* and *R. tripartita*, including flavonoids, and the DPPH values found by Akrouit [51] and Itidel [52] were in line with those measured in our study. When Alghazeer [53] studied the antioxidant activity of some plants growing in Libya, he found two times higher the amount of polyphenols in *H. albus* than we found in this study. The total carotenoid content in the Tunisian plants we analysed was quite variable. *M. vulgare* and *P. ovata* showed the highest content of these pigments (3.21 mg/g and 2.90 mg/g respectively), while *R. tripartita* presented the lowest value (0.85 mg/g). These data, presented in Table 2, reflect the lutein content measured in the plant leaves, of which *Marrubium* was found to contain the highest amount (0.43 mg/g): around 4.5 times higher than the average of the other plants. There are no available data in literature about the content of lutein or carotenoids in the plants examined in this work, so the results shown in the present paper represent the first indication of the level of these pigments.

Mass spectrometry analysis (Table 5) was performed on the acetone plant extracts, which showed a slightly higher content of total polyphenols compared to the methanol extracts (Table 3), and revealed the presence of a large variability of polyphenols known to be involved in several biological activities. In particular, *R. tripartita* showed a richer profile of flavonoids

Table 5. Mass spectrometry analysis of the phenolic content identified in acetonetic extracts of the studied plants.

| No | Compounds                   | m/z | Rt(min) | <i>H.fontanessii</i> | <i>H.albus</i> | <i>M.vulgare</i> | <i>P.ovata</i> | <i>T.hirsuta</i> | <i>R.tripartita</i> | <i>Z.lotus</i> |
|----|-----------------------------|-----|---------|----------------------|----------------|------------------|----------------|------------------|---------------------|----------------|
|    |                             |     |         | Concentration (ppm)  |                |                  |                |                  |                     |                |
| 1  | Quinic acid                 | 191 | 2.024   | 54.42                | 39             | 22.08            | 0.850          | 106.81           | 20.805              | 24.61          |
| 2  | Gallic acid                 | 169 | 3.870   | 0.908                | -              | 0.131            | -              | -                | -                   | 1.178          |
| 3  | Protocatechuic acid         | 153 | 6.811   | 0.398                | 0.092          | 0.159            | 0.305          | 0.346            | -                   | 0.335          |
| 4  | Catechin (+)                | 289 | 11.028  | 34.978               | -              | 0.132            | -              | 13.87            | 0.196               | 0.685          |
| 5  | 4-O-caffeoylquinic acid     | 353 | 11.701  | 0.221                | 0.178          | 11.64            | 1.651          | 70.04            | 2.227               | 0.12           |
| 6  | Caffeic acid                | 179 | 14.52   | 0.250                | 0.176          | 3.965            | -              | 0.442            | 3.669               | -              |
| 7  | Syringic acid               | 197 | 16.028  | 0.069                | 0.371          | 0.329            | 0.188          | 0.090            | 0.313               | 0.192          |
| 8  | Epicatechin                 | 289 | 16.245  | 21.51                | -              | -                | -              | 1.415            | -                   | 0.442          |
| 9  | p-Coumaric acid             | 163 | 20.904  | 1.049                | 0.449          | 0.167            | 0.154          | 0.365            | 0.178               | 1.289          |
| 10 | trans Ferulic acid          | 193 | 23.07   | 1.726                | 0.241          | 0.447            | 0.089          | 0.749            | 0.504               | 0.136          |
| 11 | Rutin                       | 609 | 23.838  | 112.4                | 39.545         | 10.031           | 7.198          | 0.674            | 11.656              | 529.4          |
| 12 | Luteolin-7-o-glucoside      | 447 | 24.604  | -                    | -              | -                | 2.375          | 1.56             | 7.179               | -              |
| 13 | Quercetin-3-o-galactoside   | 463 | 24.639  | 2.017                | 11.399         | 0.486            | 1.906          | 0.398            | 0.475               | 15.80          |
| 14 | Naringin                    | 579 | 25.786  | -                    | -              | -                | 2.474          | -                | -                   | -              |
| 15 | Quercetin-3-o-rhamonoside   | 447 | 26.579  | -                    | 12.608         | -                | -              | 5.903            | -                   | 6.983          |
| 16 | 4,5-di-O-caffeoyquinic acid | 515 | 26.732  | -                    | -              | -                | -              | -                | 0.275               | -              |
| 17 | Apigenin-7-o-glucoside      | 431 | 26.901  | -                    | -              | 0.952            | -              | -                | 1.038               | -              |
| 18 | Salviolinic acid            | 717 | 28.245  | -                    | -              | 0.232            | -              | -                | -                   | -              |
| 19 | Quercetin                   | 301 | 31.895  | 0.106                | -              | -                | 0.064          | -                | 0.020               | 0.278          |
| 20 | trans-Cinnamic acid         | 147 | 31.9    | 0.233                | -              | -                | 0.170          | -                | 0.031               | -              |
| 21 | Kaempferol                  | 285 | 31.944  | 0.254                | -              | 0.178            | 0.488          | 3.705            | 0.147               | 0.118          |
| 22 | Silymarin                   | 481 | 33.481  | -                    | -              | 0.751            | -              | -                | 0.869               | -              |
| 23 | Naringenin                  | 271 | 33.882  | 0.074                | -              | 0.233            | -              | 0.222            | 0.240               | 0.043          |
| 24 | Apegenin                    | 269 | 34.531  | 0.030                | -              | 0.952            | 0.358          | 0.716            | 0.354               | 0.035          |
| 25 | Luteolin                    | 285 | 34.943  | -                    | 1,172          | -                | -              | -                | -                   | 0.406          |
| 26 | Acacetin                    | 283 | 40,319  | -                    | -              | 0.164            | -              | 0.145            | 0.220               | -              |

N.D. = Not Detected

<https://doi.org/10.1371/journal.pone.0213049.t005>

than the other plants we analysed, with a high amount of luteolin-7-o-glucoside and apigenin-7-o-glucoside, which are both involved in cancer prevention [54]. *Z. lotus* showed around 15 times higher the amount of rutin, a glycoside of the flavonoid quercetin with a documented anti-inflammatory and anti-carcinogenic activity [55], than the average value found in the other Tunisian plants. In *H. fontanessii*, high concentrations were found of catechin, epicatechin and rutin, which are all molecules involved in the prevention and treatment of chronic diseases in humans such as inflammatory diseases [56]. Finally, *T. hirsuta* showed the highest amount of the flavonoid kaempferol: more than 10 times higher than the average amount registered for the other examined plants. This analysis is important for the comparison of the profile of these metabolites among the examined plants; this phenolic prospect could allow in future to relate the observed biological activity with the presence of some metabolite, particularly abundant in some extract.

Data about the content of saponins and alkaloids in the examined aromatic plants are expressed as a % of the dry weight and are shown in Table 3. Regarding the content of the glycosides triterpenoids, *R. tripartita* showed the highest amount (12 mg/g DW), while in the other plant leaf extracts, the amount of saponins ranged between 0.3% and 0.9%, with a high sampling variance  $\sigma^2$  of 0.09. The saponin content measured in *Z. lotus* (0.9%) was more than

double the amount (0.4%) found by Abdoul-Azize [50], while in *P. ovata*, the concentration of these compounds (0.8%) was in line with that observed by Mamta [57] which measured a content of 0.7% in the leaves.

The highest alkaloid percentage was registered in *T. hirsuta* (1.3%), while the lowest value was found in *P. ovata* (0.1%); in all the other plants, the values ranged between 0.3 and 0.5%. There are few data available in literature about the measurement of the total alkaloid content in these plants; the same percentage (0.3) registered for *Marrubium* was found by Ohtera et al. [58] for the betonicine and stachydrine alkaloids.

### Anti-proliferative activity

The cytotoxicity of the seven plant extracts was performed against two human cancer cell lines, CaCo-2 (colon carcinoma) and K-562 (myelogenous leukemia). Results revealed a concentration and species-dependent cytotoxic effect of the examined extracts; the cell viability of the two cancer cell lines, expressed as a percentage, is shown in Fig 2. Out of the seven plant extracts, *Rhus tripartita* was found to be the most effective in inhibiting cell proliferation ( $IC_{50}$  value < 50  $\mu\text{g}/\text{ml}$ ), in particular of the K-562 leukaemia tumour cell line. These data confirmed the results obtained by Najjaa et al. [8], who found that *Rhus tripartita* displayed the strongest anti-cancer activity against colon adenocarcinoma cell lines (DLD-1). In fact, data presented in this paper showed that *Rhus tripartita* extracts, perhaps due to the high variability and concentration of polyphenols, possess the highest growth inhibitory and cytotoxic effects on carcinoma and leukaemia cell lines.

### In-vitro anti-inflammatory activity

Denaturation of proteins, with the consequent loss of their biological activity, is a well-documented cause of inflammation [59]; therefore, agents that cause the prevention of precipitation

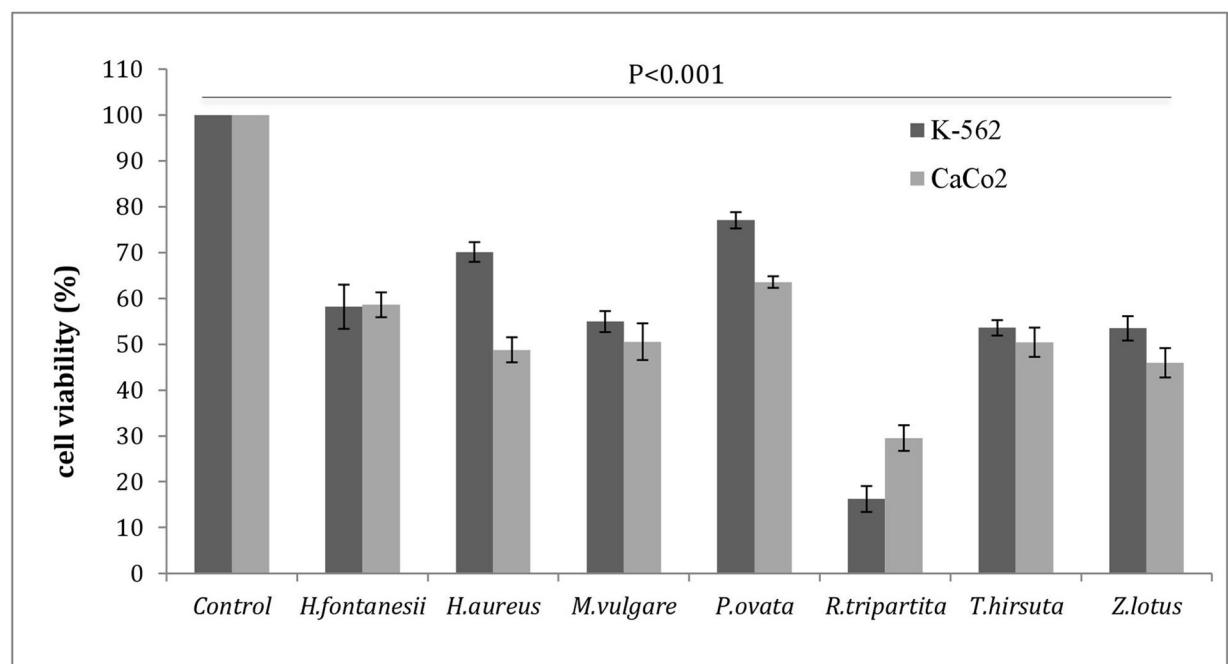

**Fig 2. Cell viability (%).** Anti-proliferative activities of the different ethanol extracts (100  $\mu\text{g}/\text{ml}$ ) of Tunisian medicinal plants tested on two neoplastic cell lines (K-562 and CaCo-2). Data are presented as mean values  $\pm$  standard deviation ( $n = 3$ ). Statistical analysis: unpaired STUDENT T-test. The results were statistically significant compared with the untreated cells (control) ( $p < 0.001$ ).

<https://doi.org/10.1371/journal.pone.0213049.g002>

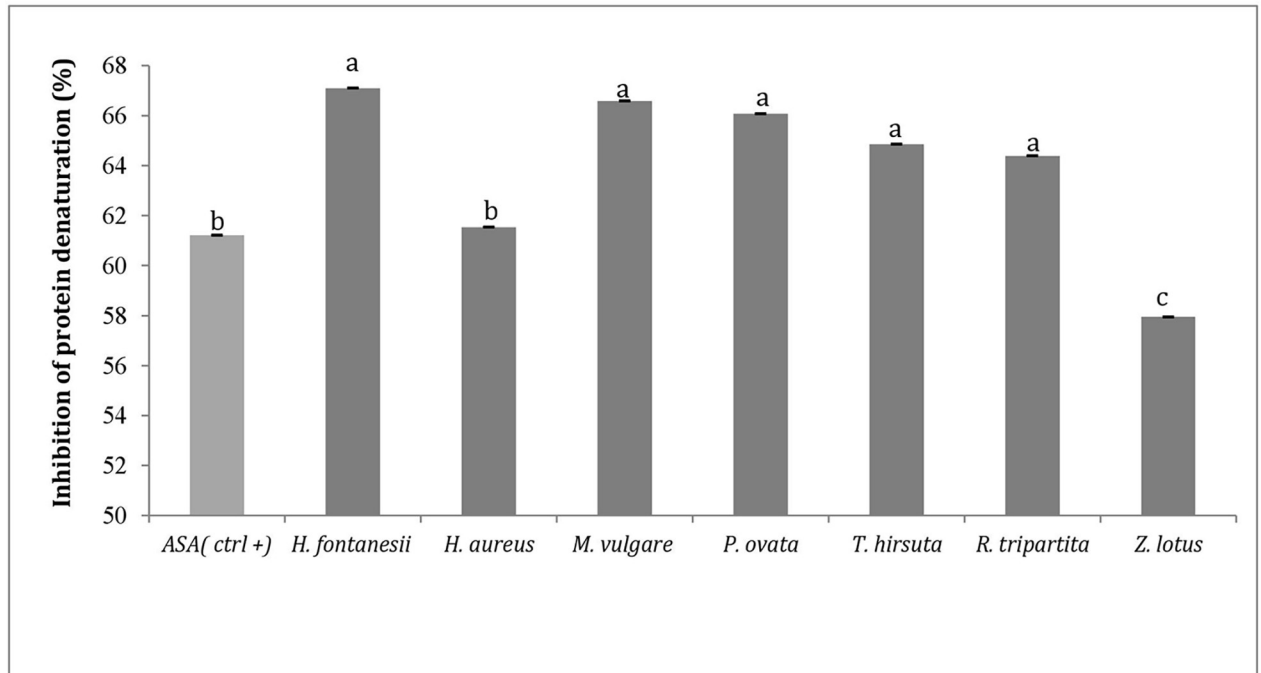

ASA: acetylsalicylic acid

**Fig 3. Inhibition of protein denaturation (%)**. Anti-inflammatory activity of the different methanolic extracts (100 µg/ml) of the tested Tunisian medicinal plants. Data are presented as mean values ± standard deviation (n = 3). Statistical analysis: ANOVA test and DUNCAN test. <sup>a,b,c</sup> Different letters above the bars indicate significant differences (p<0.05).

<https://doi.org/10.1371/journal.pone.0213049.g003>

of denatured protein aggregates and protein condensation are considered useful in disease treatment such as rheumatic disorders, cataracts and Alzheimer's disease [60, 61]. As part of the investigation into the mechanism of anti-inflammatory activity, the ability of the examined plant extracts to inhibit protein denaturation was studied and results are presented in Fig 3.

No remarkable differences were registered among the examined plant extracts; except for *Z. lotus*, which presented a slightly lower percentage of inhibition of protein denaturation than the other aromatic plants, a concentration of 100 µg/ml of plant extract was shown to be very effective in inhibiting heat induced albumin denaturation in a range between 59.94% and 67.10%. Acetylsalicylic acid (ASA), used as a control reference, showed 61.21% inhibition.

### Acetylcholinesterase inhibition

Aromatic plant extracts were tested to determine their ability to inhibit acetylcholinesterase activity. This enzyme (*AChE*) regulates hydrolysis of acetylcholine (*ACh*) in the brain, so it is an important target for the treatment of Alzheimer's disease (AD) [62], a feature of which is *ACh* deficiency.

Results, expressed as  $IC_{50}$  values and presented in Fig 4, showed that, except for *H. albus*, all the plants are able to inhibit *AChE* activity by 50%, at a concentration less than or equal to 1 mg/ml. This inhibitory activity could be attributed to the chemical compositions of plants mainly containing flavonoids, phenolic acids and tannins, as well as, to the possible synergistic interaction between these components [63, 64]. The results obtained in this work are in concordance with those found by Orhan et al. [65], who used acetone extracts from several

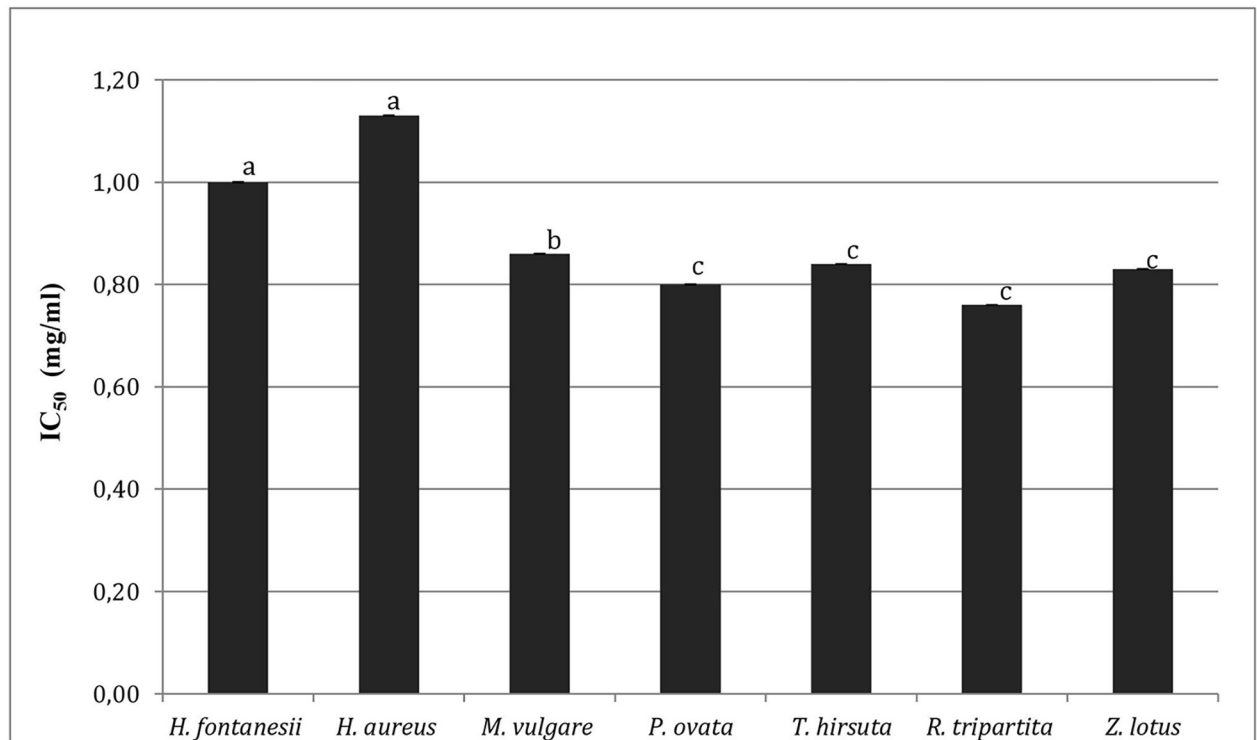

**Fig 4. IC<sub>50</sub> (mg/ml).** Acetylcholinesterase activity inhibition of ethanol extracts of the tested Tunisian medicinal plants. Data are presented as mean values  $\pm$  standard deviation ( $n = 3$ ). Statistical analysis: ANOVA test and DUNCAN test. <sup>a,b,c</sup> Different letters above the bars indicate significant differences ( $p < 0.05$ ).

<https://doi.org/10.1371/journal.pone.0213049.g004>

aromatic plants, and in the range of the values reported for other Lamiaceae and Fumariaceae species [66, 67].

## Conclusions

This work offers an overview of some biochemical and biological properties of seven aromatic plants, traditionally used in the Tunisian region in folk medicine. Both biochemical and biological tests were performed to provide a complete framework for each plant examined in this study. All the tested Tunisian plants showed a remarkable presence of secondary metabolites, involved in several biological activities. In particular, *Rhus tripartita* has a high content of polyphenols and saponins, responsible for the significant anti-proliferative activity. Due to the abundance of bioactive metabolites, all the extracts obtained by the plants were shown to be able to inhibit *AChE* activity by 50%, at a concentration less than or equal to 1 mg/ml; moreover, these extracts were shown to be efficient, with the exception of *Z. lotus*, in the prevention of precipitation of the denatured protein aggregates involved in inflammation. In conclusion, all the data confirm the importance of the Tunisian local vegetation as a potential source of various bioactive phytochemical compounds; the investigation is based on the need for different biological agents from natural sources with potent activity and lesser side effects as substitutes for chemical therapeutics.

## Supporting information

**S1 Fig. Antiproliferative activity (%).** Cell viability of Caco-2, K-562, after treatment with 10, 25, 50 and 100  $\mu\text{g/ml}$  of the different ethanol extracts for 72 h. Data are presented as mean

values  $\pm$  standard deviation ( $n = 3$ ). Statistical analysis: unpaired STUDENT T-test. The results were statistically significant compared with the untreated cells (control) ( $p < 0.001$ ).

(TIF)

**S2 Fig. Cell viability in 70% ethanol.** MTT results showing the cell viability (%) for the cell lines CaCo-2 and K-562 incubated with 70% ethanol compared to that one of the un-treated cells (control)

(TIF)

## Acknowledgments

This work was conducted within an Agreement between the University of Pavia, Italy and the Range Ecology Laboratory, Arid Lands Institute of Medenine, Tunisia. The authors thank Prof. Mohamed Neffati, an expert in the field of the ethnobotanical value of the spontaneous plants of the Tunisian arid zones, for botanical identification.

## Author Contributions

**Conceptualization:** Daniela Buonocore, Enrico Doria.

**Data curation:** Hajer Tlili, Daniela Buonocore, Manuela Verri, Enrico Doria.

**Formal analysis:** Najjaa Hanen, Abdelkerim Ben Arfa, Abdelbasset Boubakri, Daniela Buonocore, Manuela Verri, Enrico Doria.

**Investigation:** Hajer Tlili.

**Methodology:** Najjaa Hanen, Enrico Doria.

**Resources:** Mohamed Neffati.

**Software:** Abdelkerim Ben Arfa, Abdelbasset Boubakri, Manuela Verri.

**Supervision:** Mohamed Neffati.

**Validation:** Maurizia Dossena.

**Visualization:** Maurizia Dossena.

**Writing – original draft:** Hajer Tlili, Enrico Doria.

**Writing – review & editing:** Najjaa Hanen, Manuela Verri.

## References

1. Doit C, Barre J, Cohen R, Bonacorsi S, Bourrillon A, Bingen E. Bactericidal activity against intermediately cephalosporin resistant *Streptococcus pneumoniae* in cerebrospinal fluid of children with bacterial meningitis treated with high doses of cefotaxime and vancomycin. *Antimicrob. Agents Chemother.* 1997; 41: 2050–2052. PMID: [9303415](https://pubmed.ncbi.nlm.nih.gov/9303415/)
2. Essawi T, Srour M. Screening of some Palestinian medicinal plants for antibacterial activity. *J Ethnopharmacol.* 2000; 70: 343–349. [https://doi.org/10.1016/s0378-8741\(99\)00187-7](https://doi.org/10.1016/s0378-8741(99)00187-7) PMID: [10837997](https://pubmed.ncbi.nlm.nih.gov/10837997/)
3. Mehtab P, Ali MM, Mahbbob A, Faheem A, Pedro SPS, Manuela RS. Two new phenolic compounds from *Ficus rumphii* and their antiproliferative activity. *J Nat Prod Res.* 2014; 28: 646–652.
4. El-Seedi HR, Burman R, Mansour A, Turki Z, Boulou L, Gullbo, J. The traditional medical uses and cytotoxic activities of sixtyone Egyptian plants: discovery of an active cardiac glycoside from *Urginea maritima*. *J. Ethnopharmacol.* 2013; 145: 746–757. <https://doi.org/10.1016/j.jep.2012.12.007> PMID: [23228916](https://pubmed.ncbi.nlm.nih.gov/23228916/)
5. Ouelbani R, Bensari S, Mouas TN, and Khelifi D. Ethnobotanical investigations on plants used in folk medicine in the regions of Constantine and Mila (North-East of Algeria). *J. Ethnopharmacol.* 2016; 194: 196–218. <https://doi.org/10.1016/j.jep.2016.08.016> PMID: [27592312](https://pubmed.ncbi.nlm.nih.gov/27592312/)

6. Cordell G. Changing strategies in natural products chemistry. *Phytochemistry*. 1995; 40: 1585–1612
7. Chevallier A. *The encyclopedia of medicinal plants*. Dorling Kindersley 1996; London
8. Najjaa H, Arfa A, Ben Máthé Á, & Neffati M. Medicinal and Aromatic Plants of the World–Africa 2017; 3.
9. Kabbaj FZ, Meddah B, Cherrah Y, El M, and Faouzi A. Ethnopharmacological profile of traditional plants used in Morocco by cancer patients as herbal therapeutics. *Phytopharmacology*. 2012; 2: 243–256
10. Marrif HI, Ali BH, Hassan KM. Some pharmacological studies on *Artemisia herba-alba* (Asso.) in rabbits and mice. *J Ethnopharmacol*. 1995; 49(1): 51–55 [https://doi.org/10.1016/0378-8741\(95\)01302-4](https://doi.org/10.1016/0378-8741(95)01302-4) PMID: 8786657
11. Le Floc'h E. Contribution à une étude ethnobotanique de la Flore Tunisienne. Pub. Sci. Tunis. Programme Flore et végétation Tunisiennes. 1983
12. Le Houerou HN. La végétation de la Tunisie steppique (avec références au Maroc, en Algérie et la Libye). *Ann Inst Nat Rech Agric Tunisie*. 1969; 42: 642p
13. Ziyat A, Legssyer H, Mekhfi H, Dassouli A, Serhouchni M, Benjelloun W. Phytotherapy of hypertension and diabetes in oriental Morocco. *J Ethnopharmacol*. 1997; 58: 45–54 [https://doi.org/10.1016/s0378-8741\(97\)00077-9](https://doi.org/10.1016/s0378-8741(97)00077-9) PMID: 9324004
14. Nait Mbark AZ, Charouf V, Wray M, Nimitz T, Schopke. “Monodesmosidic saponins from *Herniaria hirsuta*,” *Die Pharmazie*, 2000; 55(9): 690–692 PMID: 11031776
15. Rhiouani H, El-Hilal J, Israïli HZ, Lyoussi B. Acute and sub-chronic toxicity of an aqueous extract of the leaves of *Herniaria glabra* in rodents *J. Ethnopharm*. 2008; 118: 378–386. <https://doi.org/10.1016/j.jep.2008.05.009>
16. Madland E. Extraction, Isolation and Structure Elucidation of Saponins from *Herniaria incana*. Norwegian University of Science and Technology. 2013
17. Hajipoor K, Sani AM. Antibacterial activity of methanol extract and essential oil of *Hyoscyamus niger* against selected pathogenic bacteria. *IJBPAS*. 2015; 4(6):4016–4026.
18. Harrison AP, Bartels EM. A modern appraisal of ancient Etruscan herbal practices. *American Journal of Pharmacology and Toxicology*. 2006; 1:26–29.
19. Zaabat N, Hay AE, Michalet S, Darbour N, Bayet C, Skandrani I. Antioxidant and antigenotoxic properties of compounds isolated from *Marrubium deserti* de Noe. *Food Chem Toxicol*. 2011; 49(12): 3328–3335. <https://doi.org/10.1016/j.fct.2011.08.026> PMID: 21924316
20. Essawy SS, Abo-elmatty DM, Ghazy NM & Badr JM. Antioxidant and anti-inflammatory effects of *Marrubium alysson* extracts in high cholesterol-fed rabbits. *Saudi Pharmaceutical Journal* 2014; 22(5), 472–482. <https://doi.org/10.1016/j.sjps.2013.12.004>
21. Schlemper V, Ribas A, Nicolau M, Cechinel Filho V. Antispasmodic effects of hydroalcoholic extract of *Marrubium vulgare* on isolated tissues. *Phytomedicine*. 1996; 3:211–6. [https://doi.org/10.1016/S0944-7113\(96\)80038-9](https://doi.org/10.1016/S0944-7113(96)80038-9) PMID: 23194972
22. Lodhi S, Vadnere G, Sharma V & Usman M. *Marrubium vulgare* L.: A review on phytochemical and pharmacological aspects. *Journal of Intercultural Ethnopharmacology*. 2017; 6(4), 429. <https://doi.org/10.5455/jice.20170713060840>
23. Pourmorad F, Hosseinimehr SJ, Shahabimajd N. Antioxidant activity, phenol and flavonoid contents of some selected Iranian medicinal plants, *African Journal of Biotechnology*. 2006; 5(11): 1142–1145.
24. Souiri E, Amin G, Farsam H, Arazandeh B, Tehrani M. Screening of antioxidant activity and phenolic content of 24 medicinal plant extracts, *DARU*. 2008; 16(2) 83–87.
25. Talukder P, Talapatra S, Ghoshal N, Sen Raychaudhuri S. Antioxidant activity and high-performance liquid chromatographic analysis of phenolic compounds during in vitro callus culture of *Plantago ovata* Forsk. and effect of exogenous additives on accumulation of phenolic compounds. *Journal of the Science of Food and Agriculture*. 2016; 96(1): 232–244. <https://doi.org/10.1002/jsfa.7086> PMID: 25640456
26. Haddadian K, Haddadian K & Zahmatkash M. A review of plantago plant. *Indian Journal of Traditional Knowledge*. 2014; 13(4), 681–685. [https://doi.org/10.1016/S0005-2736\(98\)00261-2](https://doi.org/10.1016/S0005-2736(98)00261-2)
27. Wu T, McCallum JL, Wang S, Liu R, Zhu H, Tsao R. Evaluation of antioxidant activities and chemical characterization of staghorn sumac fruit (*Rhus hirta* L.). *Food Chemistry*. 2013; 138:1333–1340 <https://doi.org/10.1016/j.foodchem.2012.10.086> PMID: 23411251
28. Giancarlo S, Rosa ML, Nadjafi F, Francesco M. Hypoglycaemic activity of two spices extracts: *Rhus coriaria* L. and *Bunium persicum* Boiss. *Natural Product Research*. 2006; 20: 882–886. <https://doi.org/10.1080/14786410500520186> PMID: 16753927
29. Ben Barka Z, Aouadhi C, Tlili M, Alimi H, Ben Miled H, Ben Rhouma K, et al. Evaluation of the anti-diarrheal activity of the hydromethanolic root extract of *Rhus tripartita* (Ucria) (Anacardiaceae). *Biomedicine*



- and Pharmacotherapy. 2016; 83:827–834. <https://doi.org/10.1016/j.biopha.2016.07.055> PMID: 27501500
30. El-Salam A & Mohammed I. Phytoconstituents and the study of antioxidant, antimalarial and antimicrobial activities of *Rhus tripartita* growing in Egypt. *Journal of Pharmacognosy and Phytochemistry JPP* 2015; 4(2), 276–281.
  31. El Amrani F, Rhallab A, Alaoui T, El Badaoui K, Chakir S. Hypoglycaemic effect of *T. hirsuta* in normal and streptozotocin-induced diabetic rats. *J. Medit. Plant. Res.* 2009; 3: 625–629.
  32. Kawano M, Matsuyama K, Miyamae Y, Shinmoto H, Kchouk ME, Morio T et al. Antimelanogenesis effect of Tunisian herb *Thymelaea hirsuta* extract on B16 murine melanoma cells. *Experimental Dermatology*. 2007; 16(12): 977–984
  33. Trigui M, Hsouna A, Ben Tounsi S, Jaoua S. Chemical composition and evaluation of antioxidant and antimicrobial activities of Tunisian *Thymelaea hirsuta* with special reference to its mode of action. *Industrial Crops and Products*. 2013; 41(1):150–157.
  34. Borris RP, Blaskó G, Cordell GA. Ethnopharmacologic and phytochemical studies of the *Thymelaeaceae*. *Journal of Ethnopharmacology*. 1988; 24:41–91. [https://doi.org/10.1016/0378-8741\(88\)90138-9](https://doi.org/10.1016/0378-8741(88)90138-9) PMID: 3059068
  35. Borgi W, Recio MC, Ríos JL, Chouchane N. Anti-inflammatory and analgesic activities of flavonoid and saponins fractions from *Zizyphus lotus* (L.) Lam. *South African Journal of Botany*. 2004; 74:320–324
  36. Adzu B., Amos S., Amizan MB., Gamaniel K., 2003. Evaluation of the anti-diarrheal effects of *Zizyphus spina-christi* stem bark in rats. *Acta Tropica*. 7, 245–50.
  37. Renault JH, Ghedira H, Thepenier P, Lavand C, Zeches-Hanrot M, Le Men-Olivier L, Dammarane saponins from *Zizyphus lotus*. *Phytochemistry*. 1997; 4:1321–7.
  38. Abdoul-Azize S, Bendahmane M, Hichami A, Dramane G, Simonin AM, Benammar C et al. Effects of *Zizyphus lotus* L. (Desf.) polyphenols on Jurkat cell signaling and proliferation. *International Immunopharmacology*. 2013; 15(2):364–371. <https://doi.org/10.1016/j.intimp.2012.11.013> PMID: 23219580
  39. Cuenod A. Flore analytique et synoptique de la Tunisie: Cryptogames vasculaires, Gymnospermes et monocotylédones. 1954. Imprimerie S.E.F.A.N. Tunisie, 287 pp.
  40. Medoua G.M., Egal A.A., Oldewage-Theron W.H., 2009. Nutritional value and antioxidant capacity of lunch meals consumed by elderly people of Sharpeville, South Africa. *Food Chemistry*. 115, 260–264.
  41. Lola-Luz T, Hennequart F, Gaffney M. Effect on yield, total phenolic, total flavonoid and total isothiocyanate content of two broccoli cultivars (*Brassica oleracea* var *italica*) following the application of a commercial brown seaweed extract (*Ascophyllum nodosum*). *Agricultural and Food Science*. 2014; 23(1): 28–37.
  42. Kurilich A, Juvik J. Quantification of carotenoid and tocopherol antioxidants in *Zea mays*. *J Agric Food Chem*. 1999; 47:1948–1955. <https://doi.org/10.1021/jf981029d> PMID: 10552476
  43. Kaur R, Arora S, Thukral AK. Quantitative and qualitative analysis of saponins in different plant parts of *Chlorophytum borivialum*. *Int J Pharm Bio Sci* 2015; 6(1), 826–835.
  44. Biradar SR, Rachetti BD. Extraction of Some Secondary Metabolites & Thin Layer Chromatography from Different Parts of *Centella Asiatica* L. (URB). *American Journal of Life Sciences*. 2013; 1(6):243.
  45. Moon JK, Shibamoto T. Antioxidant Assays for Plant and Food Components. *J. Agric. Food Chem* 2009; 57: 1655–1666. <https://doi.org/10.1021/jf803537k> PMID: 19182948
  46. Benzie IF, Strain JJ. The ferric reducing ability of plasma (FRAP) as measurement of “antioxidant power”: the FRAP assay. *Anal Biochem*. 1996; 239: 70–76. <https://doi.org/10.1006/abio.1996.0292> PMID: 8660627
  47. Chao HC, Najjaa H, Villareal MO, Ksouri R, Han J, Neffati M, Isoda H. *Arthrophytum scoparium* inhibits melanogenesis through the down-regulation of tyrosinase and melanogenic gene expressions in B16 melanoma cells. *Experimental Dermatology*. 2013; 22: 131–136. <https://doi.org/10.1111/exd.12089> PMID: 23362872
  48. Sakat SS. In vitro antioxidant and anti-inflammatory activity of methanol extract of *Oxalis corniculata* Linn. *International Journal of Pharmacy and Pharmaceutical Sciences* 2010; 2(1):82–87.
  49. Khadri A, Neffati M, Smiti S, Falé P, Lino ARL, Serralheiro MLM et al. Antioxidant, antiacetylcholinesterase and antimicrobial activities of *Cymbopogon schoenanthus* L. Spreng (lemon grass) from Tunisia. *LWT—Food Science and Technology*. 2010; 43(2):331–336.
  50. Abdoul-Azize S. Potential Benefits of Jujube (*Zizyphus Lotus* L.) Bioactive Compounds for Nutrition and Health. *Journal of Nutrition and Metabolism*. 2016. <http://dx.doi.org/10.1155/2016/2867470>
  51. Akrouit A, Gonzalez LA, El Jani H, Madrid PC. Antioxidant and antitumor activities of *Artemisia campestris* and *Thymelaea hirsuta* from southern Tunisia. *Food and Chemical Toxicology*. 2011; 49(2):342–347. <https://doi.org/10.1016/j.fct.2010.11.003> PMID: 21075159

52. Itidel C, Chokri M, Mohamed B, Yosr Z. Antioxidant activity, total phenolic and flavonoid content variation among Tunisian natural populations of *Rhus tripartita* (Ucria) Grande and *Rhus pentaphylla* Desf. *Industrial Crops and Products*. 2013; 51: 171–177.
53. Alghazeer Hussein El-Saltani, Saleh Nabeel, Al-Najjar Asma, Hebail Fatma1. Antioxidant and antimicrobial properties of five medicinal Libyan plants extracts Rabia. *Natural Science*. 2012; 4: 324–335.
54. Sung B, Chung HY, Kim ND. Role of Apigenin in Cancer Prevention via the Induction of Apoptosis and Autophagy. *Journal of Cancer Prevention*. 2016; 21(4), 216–226. <http://doi.org/10.1109/DEIV.2006.357424>
55. Perk AA, Shatynska-mytsyk I, Gerçek YC, Boztas K, Yazgan M, Fayyaz S et al. Rutin mediated targeting of signalling machinery in cancer cells. *Cancer Cell International*. 2014; 14(1), 1–5. <https://doi.org/10.1186/1475-2867-14-1>
56. Fan FY, Sang LX, Jiang M, McPhee DJ. Catechins and their therapeutic benefits to inflammatory bowel disease. *Molecules*. 2017; 22(3).
57. Mamta S, Amita K, Eshita M. Micropropagation and Phytochemical Profile Analysis Of Tissue Culture Grown *Plantago Ovata* Forsk. *Asian J Pharm Clin Res*. 2017; 10 (4):202–206.
58. Ohtera A, Miyamae Y, Nakai N. Identification of 6-octadecynoic acid from a methanol extract of *Marrubium vulgare* L. as a peroxisome proliferator-activated receptor gamma agonist. *Biochem Biophys Res Commun* 2013; 440(2):204–209. <https://doi.org/10.1016/j.bbrc.2013.09.003> PMID: 24025677
59. Nargund LV, Redd GR, Hariprasad V. Inhibition of albumin denaturation and anti-inflammatory activity of acetamido [(phenyl-4'-yl)-oxymethyl)]2-(p-substituted phenylamino)-1,2,4-triazoles and -1,3,4-thiadiazoles. *Indian J Exp Biol*. 1993; 31(4):395–6. PMID: 8359842
60. Saso L, Valentini G, Casini ML, Grippa E, Gatto MT, Leone MG et al. Inhibition of heat-induced denaturation of albumin by nonsteroidal antiinflammatory Drugs (NSAIDs): pharmacological implications. *Arch Pharmacol Res*. 2001; 24: 150–158
61. Chatterjee P, Chandra S, Dey P, Bhattacharya S. Evaluation of anti-inflammatory effects of green tea and black tea: a comparative in vitro study. *J Adv Pharm Technol Res*. 2012; 3: 136–138. <https://doi.org/10.4103/2231-4040.97298> PMID: 22837963
62. García-Ayllón M-S, Small DH, Avila J, Sáez-Valero J. Revisiting the Role of Acetylcholinesterase in Alzheimer's Disease: Cross-Talk with P-tau and  $\beta$ -Amyloid. *Frontiers in Molecular Neuroscience*. 2011; 4:22. <https://doi.org/10.3389/fnmol.2011.00022> PMID: 21949503
63. Fawole OA, Amoo SO, Ndhiala AR, Light ME, Finnie JF, Van Staden J. Anti-inflammatory, anticholinesterase, antioxidant and phytochemical properties of medicinal plants used for pain-related ailments in South Africa. *J. Ethnopharmacol*. 2010; 127: 235–241 <https://doi.org/10.1016/j.jep.2009.11.015> PMID: 19932161
64. Hernandez MF, Falé PLV, Araújo MEM, Serralheiro MLM. Acetylcholinesterase inhibition and antioxidant activity of the water extracts of several *Hypericum* species. *Food Chem*. 2010; 120: 1076–1082.
65. Orhan IE, Belhattab R, Enol FS, Gülpınar AR, Hoşbağcı S, Kartal M. Profiling of cholinesterase inhibitory and antioxidant activities of *Artemisia absinthium*, *A. herba-alba*, *A. fragrans*, *Marrubium vulgare*, *M. astranicum*, *Origanum vulgare* subsp. *glandulosum* and essential oil analysis of two *Artemisia* species. *Industrial Crops and Products*. 2010; 32(3): 566–571.
66. Loizzo MR, Tundis R, Conforti F, Menichini F, Bonesi M, Nadjafi F et al. *Salvia leriifolia* Benth (Lamiaceae) extract demonstrates in vitro antioxidant properties and cholinesterase inhibitory activity. *Nutr. Res*. 2010; 30: 823–83. <https://doi.org/10.1016/j.nutres.2010.09.016> PMID: 21147365
67. Adewusi EA, Moodley N, Steenkamp V. Antioxidant and acetylcholinesterase inhibitory activity of selected southern African medicinal plants. *S. Afr. J. Bot*. 2011; 77:638–644
